# Supplementary material for: Accretion, retreat and transgression of coastal wetlands experiencing sea-level rise
Source: Copernicus journal article supplement (doi:10.5194/hess-2020-439), 2020-09-14
Supplement: Supplementary file 1 [file hess-2020-439-supplement.pdf]

# Supplementary information

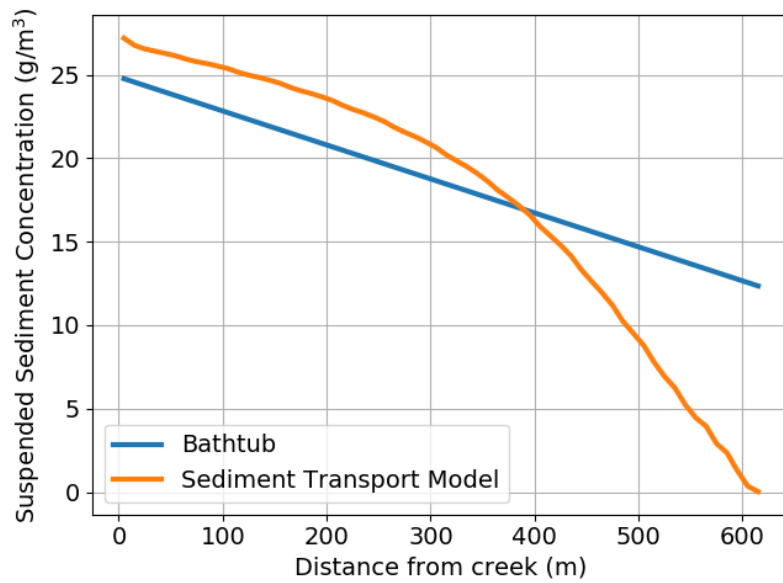

Figure S1: Comparison between bathtub and full hydrodynamic and sediment transport EGMs over a smooth topography (Manning's  $n=0.035$ )

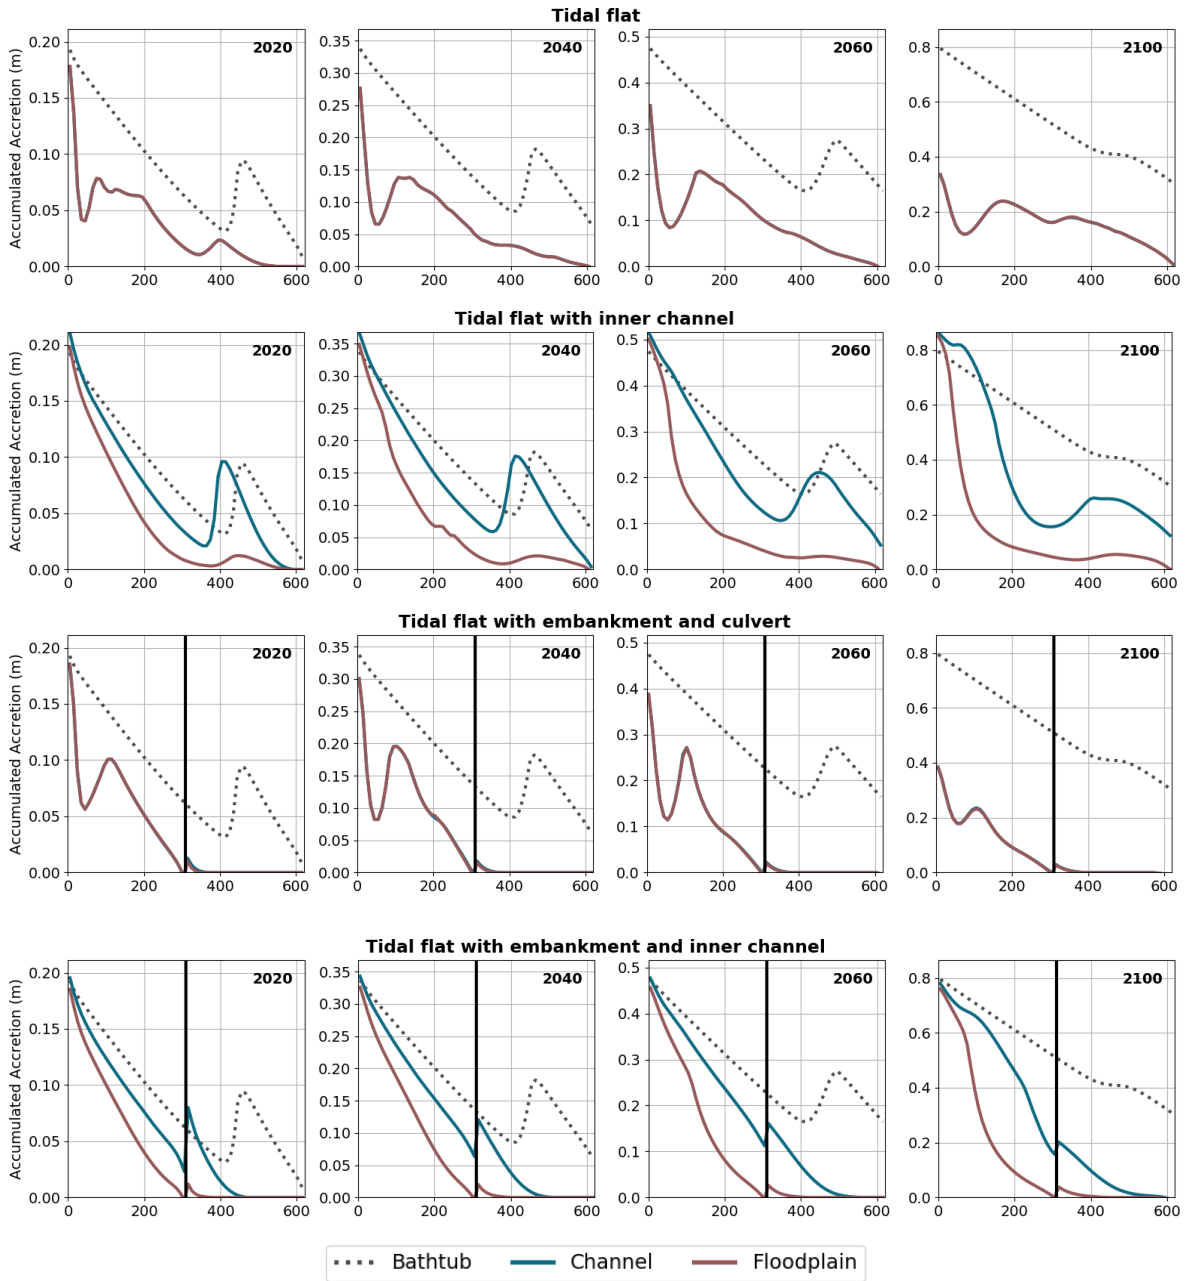

Figure S2. Longitudinal profiles of accumulated accretion ( $\Delta E$ , m) for a sediment supply of  $111 \text{ g/m}^3$ . The vertical black line represents the embankment with culvert. The “channel” profile represents the accretion near the central channel, while the “tidal flat” profile is situated in the middle of the tidal flat.
